# Supplementary material for: Mechanistic studies of Ni-catalyzed electrochemical homo-coupling reactions of aryl halides
Source: Royal Society of Chemistry journal article supplement (doi:10.1039/d3fd00069a), 2023-01-01
Supplement: d3fd00069a1.pdf [file d3fd00069a1.pdf]

## Mechanistic Studies of Ni-Catalyzed Electrochemical Homo-Coupling

### Reactions of Aryl Halides

Jian Luo,<sup>a</sup> Michael T. Davenport,<sup>b</sup> Arianna Carter,<sup>b</sup> Daniel H. Ess,<sup>\*b</sup> and T. Leo Liu<sup>\*a</sup>

a. Department of Chemistry and Biochemistry, Utah State University, Logan, Utah 84322

b. Department of Chemistry and Biochemistry, Brigham Young University, Provo, Utah 84604

Corresponding: [dhe@chem.byu.edu](mailto:dhe@chem.byu.edu), [leo.liu@usu.edu](mailto:leo.liu@usu.edu)

### Contents

|                                                                                                                       |   |
|-----------------------------------------------------------------------------------------------------------------------|---|
| 1. Materials .....                                                                                                    | 2 |
| 2. General Procedure .....                                                                                            | 2 |
| 2.1 Ni-catalyzed electrochemical homo-coupling of aryl bromide.....                                                   | 2 |
| 2.2 Preparation of the Ni <sup>I</sup> (dtbbpy)Br species.....                                                        | 3 |
| 2.3 Synthesis of the Ni <sup>II</sup> (dtbbpy)(C <sub>6</sub> H <sub>4</sub> CO <sub>2</sub> Me)Br intermediate ..... | 4 |
| 2.4 Electrochemical Measurements .....                                                                                | 4 |
| Reference: .....                                                                                                      | 4 |

## 1. Materials

All solvents and reagents were purchased from commercial sources (Sigma Aldrich, TCI Chemicals, and Oakwood Chemical), unless otherwise noted, used without further purification.  $^1\text{H-NMR}$  and  $^{13}\text{C-NMR}$  measurements were performed on a Bruker FT-NMR spectrometer (500 MHz). Mass spectra (MS) were collected on a 2020 Shimadzu LC-MS with an APCI ion source. UV-Vis spectra were collected using an Agilent Cary 100 UV-Vis spectrometer. The standard reaction mixture was diluted for 5 times with DMAc for UV-Vis tests of  $\text{Ni}^{\text{II}}$  species and diluted for 50 times for the UV-Vis tests of  $\text{Ni}^{\text{I}}$  intermediate. Electrochemical measurements were performed on a Gamry Instruments 1000 electrochemical workstation. The electrochemical catalytic reactions were investigated using the Chronopotentiometry (CP) method by a Gamry Instruments 5000 electrochemical workstation or a Land battery testing system. Thin-layer chromatography (TLC) was conducted to monitor the reactions. All compounds were purified by flash column chromatography with silica gel.

## 2. General Procedure

### 2.1 Ni-catalyzed electrochemical homo-coupling of aryl bromide

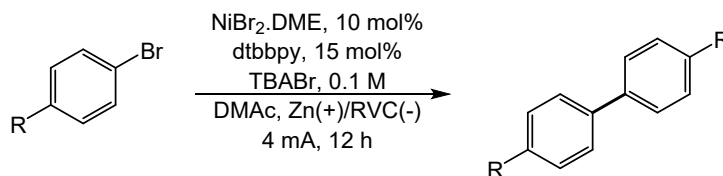

In an Ar filled glovebox, a reaction vial was charged with aryl bromide (0.5 mmol, 1.0 eq.),  $\text{NiBr}_2 \cdot \text{DME}$  (16 mg, 50  $\mu\text{mol}$ , 10 mol%), dtbbpy ligand (21 mg, 74  $\mu\text{mol}$ , 15 mol%), TBABr (161 mg, 0.1 M), DMAc (5 mL). A homemade Zn metal electrode was used as an anode, and a RVC electrode was used as a cathode. The reaction was performed at room temperature with a constant current of 4.0 mA for 12 h. The reaction was monitored with TLC. After the reaction was done, the electrodes were washed with EtOAc ( $2 \times 5$  mL) in an ultrasonic bath, and the washing solution was combined with the reaction mixture. The reaction mixture was diluted with EtOAc, washed with a saturated NaCl solution, and dried over  $\text{MgSO}_4$ . Upon filtration, the organic layer was concentrated under reduced pressure and purified by flash column chromatography (silica gel) to afford the desired product.

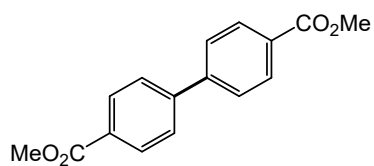

### Dimethyl 4,4'-biphenyldicarboxylate

The titled compound was synthesized following the general procedure using methyl 4-bromobenzoate (108 mg) as substrate. The titled compound was obtained as a white solid, 62 mg (92% yield).

$^1\text{H}$  NMR ( $\text{CDCl}_3$ , 500 MHz, ppm):  $\delta$  3.97 (s, 6H), 7.72 (d,  $J = 5.0$  Hz, 4H), 8.16 (d,  $J = 5.0$  Hz, 4H).  $^{13}\text{C}$  NMR ( $\text{CDCl}_3$ , 125 MHz, ppm):  $\delta$  52.23, 127.25, 129.70, 130.20, 144.36, 166.80.

APCI-MS  $m/z$  calcd for  $\text{C}_{16}\text{H}_{14}\text{O}_4^+$  ( $[\text{M}]^+$ ) 270.09, found: 270.00.

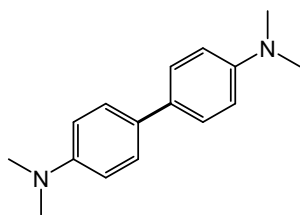

### $\text{N}^4, \text{N}^4, \text{N}^{4'}, \text{N}^{4'}$ -tetramethyl-[1,1'-biphenyl]-4,4'-diamine

The titled compound was synthesized following the general procedure using 4-bromo-N, N-dimethylaniline (100 mg) as substrate, 30 mol% dmobpy as ligand, and 152 mg DBU as the additive. The titled compound was obtained as a colorless oil, 48 mg (81% yield).

$^1\text{H}$  NMR ( $\text{CDCl}_3$ , 500 MHz, ppm):  $\delta$  2.97 (s, 12H), 6.80 (d,  $J = 8.5$  Hz, 4H), 7.45 (d,  $J = 8.5$  Hz, 6H).  $^{13}\text{C}$  NMR ( $\text{CDCl}_3$ , 125 MHz, ppm):  $\delta$  40.97, 113.24, 127.14, 130.01, 149.44.

APCI-MS  $m/z$  calcd for  $\text{C}_{16}\text{H}_{20}\text{N}_2^+$  ( $[\text{M}]^+$ ) 240.16, found: 240.05.

## 2.2 Preparation of the $\text{Ni}^{\text{I}}(\text{dtbbpy})\text{Br}$ species

$\text{Ni}^{\text{I}}(\text{dtbbpy})\text{Br}$  intermediate was synthesized by following the literature.<sup>1</sup>  $\text{NiBr}_2 \cdot \text{glyme}$  (16 mg, 50  $\mu\text{mol}$ ), dtbbpy ligand (14 mg, 50  $\mu\text{mol}$ ), and TBABr (161 mg, 1.0 mmol) were mixed in DMAc (5 mL). Control potential electrolysis (50 mV overpotential, 1 hour) or consistent current electrolysis (2.5 mA for 48 min) were conducted using Zn rod as anode and Ni foam as cathode, at room temperature. The resulting dark green solution of  $\text{Ni}^{\text{I}}(\text{dtbbpy})\text{Br}$  was used immediately for spectroscopic and reaction studies.

### 2.3 Synthesis of the Ni<sup>II</sup>(dtbbpy)(C<sub>6</sub>H<sub>4</sub>CO<sub>2</sub>Me)Br intermediate

The Ni<sup>II</sup>(dtbbpy)(C<sub>6</sub>H<sub>4</sub>CO<sub>2</sub>Me)Br intermediate was synthesized by following the literature.<sup>2,3</sup> Ni(COD)<sub>2</sub> (138 mg, 0.5 mmol), dtbbpy ligand (134 mg, 0.5 mmol) were mixed in dry THF (5 mL) under Ar atmosphere. After stirring at room temperature for 12 hours, 1.62 g methyl 4-bromobenzoate was added to the mixture and reacted for another 4 hours. When the reaction is finished, 40 mL pentane was added to the reaction mixture. The Ni<sup>II</sup>(dtbbpy)(Ar)Br intermediate was obtained as a red precipitate and collected through filtration, 119 mg (44% yield, red powder). The product was stored under Ar atmosphere at -20 °C.

### 2.4 Electrochemical Measurements

CV measurements were performed on a Gamry Instruments 1000 electrochemical workstation using a three-electrode cell, in which a glassy carbon electrode (GC) was used as a working electrode, a carbon rod as a counter electrode, and an Ag/Ag<sup>+</sup> electrode as a reference electrode, ferrocenium-ferrocene (Fc<sup>+0</sup>) as an internal standard. All potentials were referenced to the internal standard Fc<sup>+0</sup>. Before the CV testing, the working electrode was polished using Al<sub>2</sub>O<sub>3</sub> (BAS CF-1050) suspended in deionized H<sub>2</sub>O, then rinsed with deionized H<sub>2</sub>O and dried with airflow. The reference electrode consisted of a silver wire suspended in a solution of 0.2 M KPF<sub>6</sub> and 0.01 M AgNO<sub>3</sub> in dry DMAc.

*CV conditions:* Aryl halide (0.5 mmol, 1.0 eq.), NiBr<sub>2</sub>.DME (16 mg, 50 μmol, 10 mol%), dtbbpy ligand (21 mg, 75 μmol, 15 mol%), TBABr (0.1 mmol), DMAc (5 mL), glassy carbon working electrode, 100 mV/s scan rate, room temperature.

### Reference:

- (1) Till, N. A.; Oh, S.; MacMillan, D. W. C.; Bird, M. J. The Application of Pulse Radiolysis to the Study of Ni(I) Intermediates in Ni-Catalyzed Cross-Coupling Reactions. *Journal of the American Chemical Society* **2021**, *143*, 9332-9337.
- (2) Sun, S.-Z.; Martin, R. Nickel-Catalyzed Umpolung Arylation of Ambiphilic α-Bromoalkyl Boronic Esters. *Angewandte Chemie International Edition* **2018**, *57*, 3622-3625.
- (3) Cong, F.; Lv, X.-Y.; Day, C. S.; Martin, R. Dual Catalytic Strategy for Forging sp<sup>2</sup>-sp<sup>3</sup> and sp<sup>3</sup>-sp<sup>3</sup> Architectures via β-Scission of Aliphatic Alcohol Derivatives. *Journal of the American Chemical Society* **2020**, *142*, 20594-20599.
